# Supplementary material
Source: publisher figshare collection journal article supplement (https://karger.figshare.com/ndownloader/files/14228324)
Supplement: Supplementary file 1 [file 14228324]

Appendix S1:Search strategy for outcome reporting in iron deficiency and iron deficiency anemia in pregnancy and postpartum

| **Search Strategy** | | |
| --- | --- | --- |
| exp pregnancy/ or exp pregnancy complications/ or exp postpartum period/ or exp prenatal diagnosis/ or preconception care/ or (pregnan* or obstetric* or gestation*).tw. or childbirth*.tw. or (labo?r or labo?rs or labo?uring or puerper* or C?esar*).tw. or exp perinatal care/ or exp obstetric nursing/ or exp midwifery/ or exp maternal-child nursing/ or exp obstetrical surgical procedures/ or exp maternal health services/ or exp parity/ or exp postpartum period/ or ((forcep* or vacuum or ventouse or instrument* or vaginal) adj2 deliver*).tw. or (antepart* or ante-part* or prenat* or pre-nat* or perinat* or peri-nat* or peripart* or peri-part*).tw. or postnat*.tw. or post-nat*.tw. or postpart*.tw. or post-part*.tw. or obstetrics/ or maternal welfare/ or maternal mortality/ or pregnant women/ or maternal an?emia.tw.  AND  Iron/df [Deficiency] or Anemia, Iron-Deficiency/ or (iron adj3 deficien*).tw. or (low adj3 iron).tw. or  (deplet* adj3 iron).tw. or (iron adj3 loss).tw. | | |
| **Limits** | | |
| limit (english language and yr="2000 -Current")  NOT exp animal/ not human/  NOT letters/ or case report/ or editorials/  NOT (pig or pigs or rat or rATI or mouse or mice or rabbit* or sheep).ti. not (human*.ti or human/) | | |
| **Summary of Results** | | |
| **Database** | **Time Period** | **Results** |
| Medline | 2000 to Present (April 20, 2016) | 1407 |
| Embase | 2000 to 2016 Week 15 | 2481 |
| PubMed | Inprocess and non-medline | 113 |
| Cochrane CENTRAL and Database of Systematic Reviews | 2000 to April 20, 2016 | 263 |
| CINAHL |  | 2776 |
| **TOTAL** |  | **7040** |
